# Supplementary material
Source: Springer Nature journal article supplement (https://www.springermedizin.de/resource/supplementary/12936_2008_838_MOESM5_ESM.pdf/9549056)

# Pfdhfr S108N - SP

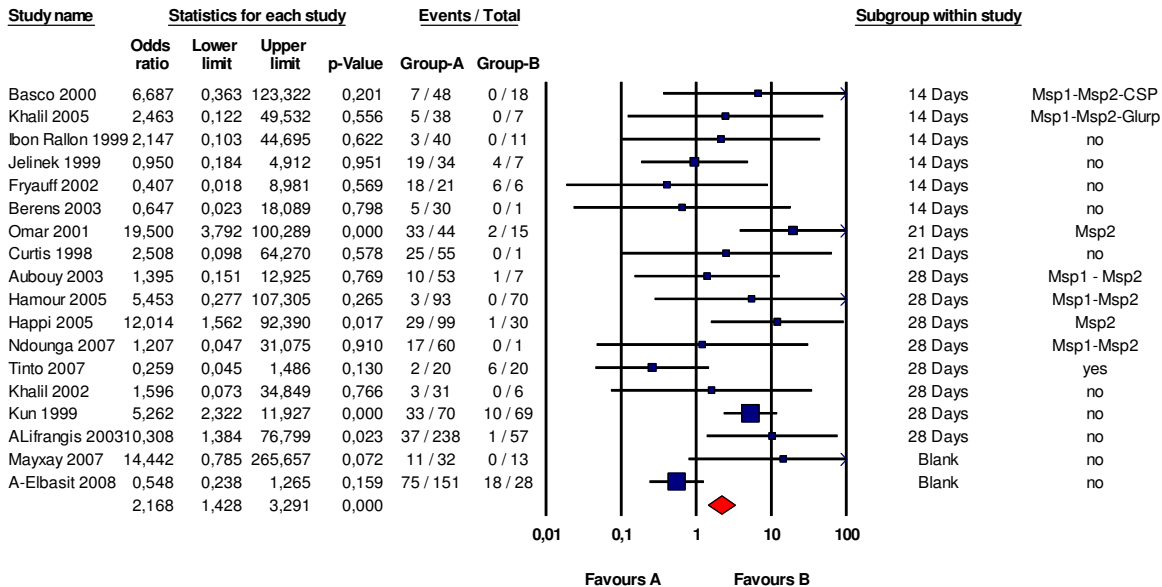

Supplement: MOESM5 [file 9549056]
